# Supplementary material
Source: ML conference proceedings conference paper supplement (https://proceedings.neurips.cc/paper_files/paper/2010/hash/091d584fced301b442654dd8c23b3fc9-Abstract.html)
Supplement: Supplementary file 1 [file overestimation.pdf › supplements/overestimation.pdf]

---

# Single Estimator Overestimation Proof

---

**Hado van Hasselt**

Multi-agent and Adaptive Computation Group  
Centrum Wiskunde & Informatica

This lemma accompanies the paper “Double Q-learning” that was accepted for publication in the Advances in Neural Information Processing Systems, volume 23 (NIPS 2010). It is a generalization of the result in [1].

**Lemma 1.** *Let  $X = \{X_1, \dots, X_M\}$  be a set of random variables and let  $\mu = \{\mu_1, \dots, \mu_M\}$  be a set of unbiased estimators such that  $E\{\mu_i\} = E\{X_i\}$ , for all  $i$ . Assume that the set of samples  $S$  contains at least one sample for each of the variables in  $X$ . Let  $\mathcal{M}$  be the set of labels of estimators that maximize the expected values of  $X$ :*

$$\mathcal{M} \stackrel{\text{def}}{=} \left\{ j \mid E\{X_j\} = \max_i E\{X_i\} \right\} .$$

*Let  $Max(S)$  be the set of labels of estimators that yield the maximum estimate for some set of samples  $S$ :*

$$Max(S) \stackrel{\text{def}}{=} \left\{ j \mid \mu_j(S) = \max_i \mu_i(S) \right\} .$$

*Then, for all  $j \in \mathcal{M}$*

$$E\{\max_i \mu_i\} \geq E\{\mu_j\} = E\{X_j\} \stackrel{\text{def}}{=} \max_i E\{X_i\} . \quad (1)$$

*Furthermore, the inequality is strict if and only if  $P(j \notin Max) > 0$ , for any  $j \in \mathcal{M}$ .*

*Proof.* Assume  $j \in \mathcal{M}$ , i.e.  $\mu_j$  is any estimator whose expected value is maximal. Then

$$\begin{aligned} E\{\max_i \mu_i\} &= P(j \in Max)E\{\max_i \mu_i\} + P(j \notin Max)E\{\max_i \mu_i\} \\ &= P(j \in Max)E\{\mu_j \mid j \in Max\} + P(j \notin Max)E\{\max_i \mu_i\} \\ &\geq P(j \in Max)E\{\mu_j \mid j \in Max\} + P(j \notin Max)E\{\mu_j \mid j \notin Max\} \\ &= E\{\mu_j\} = E\{X_j\} \stackrel{\text{def}}{=} \max_i E\{X_i\} . \end{aligned}$$

By definition of  $Max$  we have  $E\{\max_i \mu_i\} > E\{\mu_j \mid j \notin Max\}$ , for any  $j$ . Therefore, the inequality is strict if and only if  $P(j \notin Max) > 0$ , for some  $j \in \mathcal{M}$ . If we do not know whether this is the case, we do not know if the inequality in (1) is strict and therefore in general we write  $E\{\max_i \mu_i\} \geq \max_i E\{\mu_i\}$ .  $\square$

## References

- [1] J. E. Smith and R. L. Winkler. The optimizer’s curse: Skepticism and postdecision surprise in decision analysis. *Management Science*, 52(3):311–322, 2006.
